# Supplementary material for: Shyness Trajectories across the First Four Decades Predict Mental Health Outcomes
Source: Springer Nature journal article supplement (doi:10.1007/s10802-017-0265-x), 2017-01-25
Supplement: MOESM1 [file 12017712]

**Supplemental Material**

***Factor Structure of Shyness Construct***

Exploratory factory analysis with principle axis factoring and oblique (promax) rotation examined the number of factors best representing the shyness construct. Two factors were extracted using a threshold eigenvalue (> 1.0) and examining the scree plot. Factor one and two accounted for 35.52% and 8.84% of the variance, respectively. Supplemental Table 1 shows that behavioral aspects of shyness load highly on the first factor, while cognitive aspects of shyness load highly on the second factor; Factor loadings were above .40. As expected, the two factors were correlated, *r* = .58.

*Supplemental Table 1*. Factor loadings for the 6 items in the shyness composite in young adulthood (age 22-26).

| Shyness at young adulthood (*n*=274) | Factor | | |
| --- | --- | --- | --- |
| 1 | 2 | |
| I am shy |  | | .76 |
| I am self-conscious or easily embarrassed |  | | .76 |
| I keep from getting involved with others | .69 | |  |
| I am sensitive or keeps things to self | .43 | |  |
| I refuse to talk | .53 | |  |
| I would rather be alone than with others | .64 | |  |

***Quality Criterion/ Fit Indices of Different Cluster Models***

Partition quality criterion for the first solution of the 2-, 3-, 4-, and 5- cluster models are presented in Supplemental Table 2. These statistical indices have no true "cut-off/ threshold" values; they are compared across cluster solutions to guide selection of the "best" model in a statistical sense. Higher values of the Calinski Harabatz indicate better quality of partitions that maximizes between-group distances and minimizes within-group distances. Higher values of the post probability global indicate higher likelihood that each individual was assigned to the correct category in the solution. BIC values that are closer to zero indicate better model fit.

*Supplemental Table 2.* Quality criterion and model fit indices for the first solution of the cluster models

| Solution | Calinski Harabatz | Post probability global | BIC |
| --- | --- | --- | --- |
| 2 cluster | 70.14 | 0.91 | -1723.12 |
| 3 cluster | 58.44 | 0.89 | -1722.44 |
| 4 cluster | 56.32 | 0.89 | -1697.53 |
| 5 cluster | 53.52 | 0.85 | -1721.33 |

*Supplemental Figure 1.* Mean shyness trajectories from childhood to adulthood using the 2-cluster solution

Similar to the 3-cluster solution presented in the main text, the 2-cluster solution depicts a low-stable non-shy trajectory with a similar proportion (65.6%) of individuals and a high-stable shy trajectory (34.4%) of individuals that combines the two increasing and decreasing shy trajectories from the 3-cluster solution. These results show that the low-stable trajectory is mostly retained in both solutions and is clearly non-shy; whereas, that the high-stable shy trajectory is refined into increasing and decreasing trajectories, both of which we interpret as shy, in the 3-cluster solution.

***Data Imputation in Shyness Trajectories***

We imputed shyness scores for participants with only one missing data point for shyness using the Copy Mean method (Genolini & Fallisard, 2011). Copy mean uses linear interpolation to impute a value that is missing between two points, but also adds variation to the imputed value to follow the shape of the average trajectory.

This dataset with imputed values included 255 participants. The estimated trajectories on this imputed dataset are similar to those obtained without imputation, with the exception that the crossing point for the two shy trajectories is slightly shifted later after adolescence (Supplemental Figure 2). This shift may be due to more imputations in last two time points. However, results on psychiatric disorders and attention biases on this imputed dataset remain unchanged.

*Supplemental Figure 2.* Mean shyness trajectories from childhood to adulthood using the imputed dataset

*Supplemental Figure 3.* Two-way interaction between shyness trajectories and verbal bullying at adolescence and log odds of current agoraphobia.

***
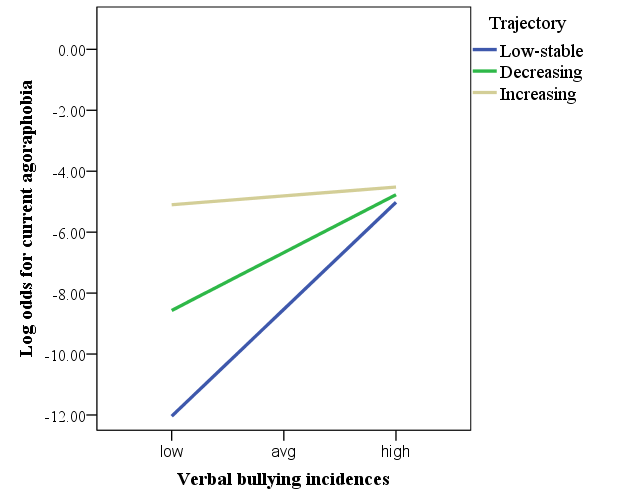
***

*Supplemental Figure 4.* Three-way interaction among shyness trajectories, self-perceived social competence and verbal bullying at adolescence and log odds of lifetime alcohol abuse and dependence *.*

***
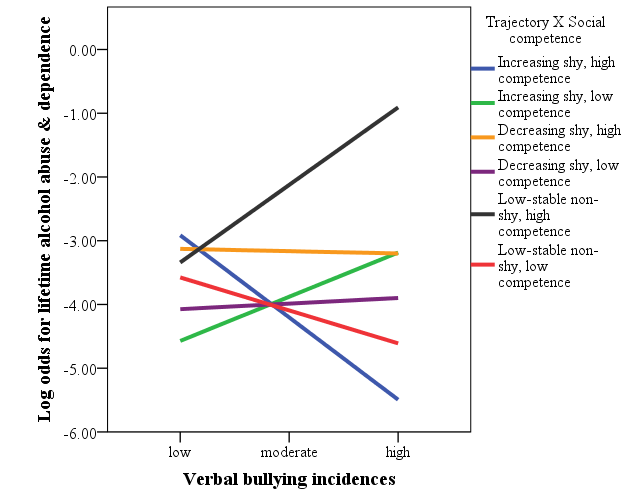
***

*Note.* Individuals with moderate levels of social competence are excluded in this graph for simplicity.

**References**

Genolini, C., & Falissard, B. (2011). Kml: K-means for longitudinal data. *Computational*

*Statistics*, *25*, 317-328.
